# Supplementary material for: Cerebrospinal Fluid Proteome Alterations Associated with Neuropsychiatric Symptoms in Cognitive Decline and Alzheimer’s Disease
Source: MDPI journal article supplement (doi:10.3390/cells11061030), 2022-03-18
Supplement: s1 [file s1]

### **Supplementary methods:**

An exploratory analysis approach on subgroups within the cohort was performed in which participants were classified according to both the occurrence of NPS (NPI-Q > 0) and the presence of cerebral AD pathology (CSF p-tau181/A $\beta$ 1–42 ratio > 0.0779). Given the small sample size of NP-/AD+ participants we could not fit neither a binomial regression nor an Elastic model on the available data. Both models were greatly overfit which was expected considering how the number of variables surpasses the number of samples. As a result, we explored the data with Mann–Whitney U test looking at the concentration of CSF proteins between with or without NPS in AD- participants or in AD+ participants. These tests did not uncover any further differentially expressed proteins but only identified a subset of the proteins that were different between groups as shown below (**Supplementary Materials Table S7**). These results are difficult to interpret since only 15 participants presenting NPS are included in the AD- group and in the AD+ only 7 participants do not have NPS. This suggests that while there is some interaction between AD and NPS, the proteins identified in association with NPS are largely independent of the presence of AD, further confirming results observed in the whole cohort in models considering AD status as a covariable.

**790 proteins investigated in this study**

|        |       |       |       |        |         |       |       |        |       |
|--------|-------|-------|-------|--------|---------|-------|-------|--------|-------|
| A1AT   | C1R   | CNTN2 | ECM1  | GLT10  | K2C6AP1 | MUC18 | PCP4  | RCN2   | SYT7  |
| A1BG   | C1RL  | CNTN4 | ECM2  | GLT13  | KAIN    | MXRA8 | PCSK1 | RELN   | SYUB  |
| A2AP   | C1S   | CNTP2 | EDN3  | GLT15  | KCRM    | MYG   | PCSK5 | RET4   | SYUG  |
| A2GL   | C99L2 | CNTP4 | EFC14 | GLT18  | KCRU    | MYH15 | PDGFB | RGMA   | SZT2  |
| A4     | CA2D1 | CO1A1 | EFNA1 | GLU2B  | KIT     | MYH7  | PDIA1 | RGMB   | T132A |
| AACT   | CAB45 | CO1A2 | EFNB2 | GMFB   | KLK6    | MYOC  | PDIA3 | RNAS1  | T132D |
| AATC   | CAD10 | CO2   | EH1L1 | GNAS3  | KLKB1   | NAC2  | PDIA6 | RNAS4  | TAGL  |
| ABCA2  | CAD11 | CO3   | EMIL1 | GNPTG  | KNG1    | NAR3  | PDYN  | RNAS6  | TAGL2 |
| ABHEA  | CAD13 | CO3A1 | EMIL2 | GOLI4  | KPYM    | NBL1  | PEBP1 | RNT2   | TAGL3 |
| ACBP   | CAD15 | CO4A  | ENDD1 | GOLM1  | L1CAM   | NCAM1 | PEBP4 | ROBO1  | TBD2A |
| ACON   | CAD20 | CO4B  | ENOA  | GP158  | LAC2    | NCAM2 | PEDF  | ROR1   | TCO2  |
| ACTAP2 | CADH2 | CO5   | ENOG  | GPC1   | LAIR1   | NCAN  | PENK  | RTN4R  | TEFF1 |
| ACTB   | CADH4 | CO6   | ENPL  | GPR37  | LAMA2   | NCHL1 | PGAM1 | S10A6  | TENR  |
| ACYP2  | CADH5 | CO6A1 | ENPP2 | GPX3   | LAMB2   | NDRG2 | PGBM  | S10A7  | TENX  |
| ADA10  | CADH6 | CO6A3 | EPDR1 | GRIA4  | LAMC1   | NEC1  | PGCB  | S10A8  | TETN  |
| ADA11  | CADH7 | CO7   | EPHA4 | GRP78  | LAMP1   | NEC2  | PGK1  | S10A9  | TGBR3 |
| ADA22  | CADH8 | CO8A  | EPHA5 | GSLG1  | LAMP2   | NEDD8 | PGRC1 | S38AA  | TGON2 |
| ADA23  | CADM1 | CO8B  | EPHA7 | GSTP1  | LBP     | NEGR1 | PGRP2 | S39AA  | THBG  |
| ADAM9  | CADM2 | CO8G  | EPHAA | GUAD   | LCAT    | NELL2 | PGS1  | SAMP   | THIO  |
| ADIRF  | CADM3 | CO9   | EPHB2 | H14    | LCN1    | NENF  | PGS2  | SAP    | THRB  |
| ADT2   | CADM4 | COCH  | EPHB6 | H6ST3  | LDHB    | NEO1  | PHLD  | SAP3   | THSD4 |
| AEBP1  | CAH1  | COF1  | ERP44 | HABP2  | LEG1    | NEU1  | PI16  | SBP1   | THY1  |
| AFAM   | CAH11 | COFA1 | ESAM  | HBA    | LFG2    | NEUG  | PIANP | SCG1   | TICN1 |
| AGRIN  | CAH2  | COIA1 | ETBR2 | HBB    | LFNG    | NEUM  | PIMT  | SCG2   | TICN2 |
| AKA11  | CAH3  | COL12 | EXTL2 | HBD    | LG3BP   | NEUS  | PITH1 | SCG3   | TICN3 |
| ALBU   | CALB1 | COMP  | F13B  | HEG1   | LIGO1   | NFASC | PKHB1 | SCN3B  | TIMP1 |
| ALDOA  | CALB2 | COTL1 | FA10  | HELZ   | LMAN1   | NFH   | PLD3  | SCN4B  | TIMP2 |
| ALDOC  | CALM  | CP089 | FA12  | HEMO   | LMAN2   | NFM   | PLD4  | SCRG1  | TITIN |
| ALS    | CALR  | CPN2  | FA5   | HEP2   | LPHN1   | NID1  | PLMN  | SE6L1  | TM59L |
| AMBP   | CANT1 | CPVL  | FA69C | HEXA   | LPHN3   | NID2  | PLOD1 | SE6L2  | TMED4 |
| AMD    | CART  | CRAC1 | FA9   | HGFA   | LRC4B   | NIN   | PLSL  | SELM   | TMG1  |
| ANFC   | CASC4 | CRDL1 | FABP4 | HGFL   | LRC57   | NOE1  | PLTP  | SEM3B  | TNR21 |
| ANGI   | CATB  | CREL1 | FABP5 | HRG    | LRCH3   | NOV   | PLXB2 | SEM3G  | TP53B |
| ANGL7  | CATD  | CRHBP | FABPH | HS71L  | LRP1    | NPC2  | PMGT1 | SEM4B  | TPIS  |
| ANGT   | CATF  | CRLD1 | FAM3C | HSP13  | LRP11   | NPDC1 | PNOC  | SEM6A  | TPM1  |
| ANT3   | CATH  | CRP   | FAT2  | HSP7C  | LRP2    | NPTX1 | PON1  | SEM6D  | TPP1  |
| ANXA1  | CATL1 | CS010 | FBLN1 | HTRA1  | LRP8    | NPTX2 | POSTN | SEM7A  | TRFE  |
| AP2B1  | CATS  | CSF1  | FBLN3 | HYOU1  | LSAMP   | NPTXR | PPGB  | SEP_15 | TRY1  |
| APC    | CATZ  | CSF1R | FBLN5 | IBP2   | LSR     | NPY   | PPIA  | SEPP1  | TSP1  |
| APLP1  | CBG   | CSMT1 | FBLN7 | IBP3   | LTBP1   | NRCAM | PPIB  | SETX   | TSP2  |
| APLP2  | CBLN1 | CSPG2 | FBN1  | IBP4   | LTBP2   | NRN1  | PPIC  | SET6   | TSP4  |
| APOA2  | CBLN3 | CSTN1 | FCG2A | IBP5   | LTBP4   | NRP1  | PPN   | SFRP3  | THHY  |
| APOA4  | CBPB2 | CSTN2 | FCGBP | IBP6   | LUM     | NRP2  | PRAP1 | SFRP4  | TYB10 |
| APOD   | CBPE  | CSTN3 | FETUA | IBP7   | LUZP2   | NRX1A | PRC2C | SGCE   | TYB4  |
| APOE   | CBPN  | CTGF  | FETUB | IC1    | LY6H    | NRX2A | PRDX1 | SH3L1  | UB2L3 |
| APOH   | CBPQ  | CUTA  | FGD6  | ICAM2  | LYAG    | NRX3A | PRDX2 | SH3L3  | UBBP1 |
| ARHG5  | CCKN  | CXCL7 | FGFR1 | ICAM5  | LYSC    | NSG1  | PRDX6 | SHBG   | UBQL2 |
| ARSA   | CCL2  | CXL16 | FGFR2 | ICOSL  | LYST    | NTNG1 | PRELP | SHPS1  | UCHL1 |
| ASHA1  | CD048 | CYC   | FGFR3 | IDD    | LYVE1   | NTRI  | PRG4  | SHSA5  | UFO   |
| ASPG   | CD109 | CYTA  | FHL1  | IDS    | MA1A1   | NTRK2 | PRIO  | SHSA6  | UK114 |
| ASPH   | CD14  | CYTB  | FHR1  | IGF2   | MA1C1   | NUCB1 | PRKDC | SIAE   | VAMP2 |
| AT1A2  | CD166 | CYTC  | FHR2  | IGHG1  | MA2A1   | NUCB2 | PROC  | SIAT2  | VAS1  |
| AT1A3  | CD44  | CYTL1 | FIBA  | IGKC   | MA2A2   | NXPH1 | PROF1 | SKP1   | VASN  |
| ATPA   | CD59  | DAF   | FIBB  | IGLO5  | MAG     | NXPH4 | PROS  | SLIK1  | VCAM1 |
| ATPB   | CDC27 | DAG1  | FINC  | IGS21  | MANBA   | OAF   | PRRT2 | SLIK4  | VGF   |
| ATRN   | CELR2 | DCC   | FMOD  | IGSF1  | MANS1   | ODP2  | PRRT3 | SLPI   | VIME  |
| ATS1   | CERU  | DCD   | FOLR2 | IGSF8  | MARCS   | ODPB  | PRUN2 | SMOC1  | VSIG4 |
| ATS2   | CFAB  | DDAH1 | FRIL  | IL6RB  | MASP1   | OLFL3 | PRVA  | SMS    | VTDB  |
| ATS3   | CFAD  | DDR1  | FRS1L | IMPA3  | MDHC    | OMD   | PTGDS | SNED1  | VTM2A |
| ATS8   | CFAH  | DHE3  | FSIP2 | IPSP   | MDHM    | OMGP  | PTHD2 | SODC   | VTM2B |
| AUGN   | CFAI  | DHPR  | FSTL1 | ISK6   | MEG10   | OPCM  | PTN   | SODE   | VTNC  |
| B2MG   | CGRE1 | DIA1R | FSTL4 | ISLR   | MEGF8   | OSTP  | PTPR2 | SORC1  | VWA1  |
| B3GN1  | CH10  | DIAC  | FSTL5 | ISLR2  | METRL   | OX2G  | TPPRD | SORC2  | VWC2  |
| B3GN2  | CH3L1 | DIDO1 | FUCO  | ITI1H  | MFAP4   | P3IP1 | PTPRF | SORC3  | VWF   |
| B4GN1  | CH60  | DKK3  | FUCO2 | ITI1H2 | MFSD6   | PAG15 | PTPRG | SORT   | WFDC1 |
| B4GT1  | CHAD  | DMP4  | G3P   | ITI1H3 | MIA     | PALM  | PTPRK | SPB6   | WFDC2 |

|       |       |       |       |       |       |       |       |       |         |
|-------|-------|-------|-------|-------|-------|-------|-------|-------|---------|
| BAI1  | CHRD  | DNER  | G6PI  | ITIH4 | MIA3  | PARK7 | PTPRN | SPD2B | WFKN2   |
| BAI2  | CHSTA | DNJA1 | GALT2 | ITIH5 | MICU1 | PCD16 | PTPRS | SPIT2 | WSCD1   |
| BAI3  | CI117 | DNJC3 | GALT6 | ITM2B | MIME  | PCD17 | PTPRT | SPON1 | X1433B  |
| BASI  | CL049 | DNS2A | GALT7 | JAM2  | MLEC  | PCDC2 | PTPRZ | SPRC  | X1433Z  |
| BASP1 | CLC11 | DPP10 | GANAB | JAM3  | MMP2  | PCDGK | PUR2  | SPRL1 | X1A68   |
| BGH3  | CLN5  | DPP2  | GAS6  | K0319 | MMRN2 | PCDGM | PVR   | SPTB2 | X1C12P1 |
| BLVRB | CLUS  | DPP6  | GDF11 | K154L | MOES  | PCDH1 | PVRL1 | SPTN5 | X4F2    |
| BMP1  | CMGA  | DSC2  | GDN   | K1C10 | MOG   | PCDH7 | PXDC2 | STC2  | X7B2    |
| BTD   | CNDP1 | DSC3  | GELS  | K1C14 | MROH7 | PCDH8 | QSOX1 | STML2 | XYLT1   |
| C163A | CNPY4 | DSG2  | GFRA2 | K1C9  | MSLN  | PCDH9 | QSOX2 | STMN1 | YIPF3   |
| C1QB  | CNR1  | DYH10 | GGH   | K22E  | MT1E  | PCNT  | R4RL2 | STX12 | ZA2G    |
| C1QC  | CNTFR | DYH5  | GLDN  | K2C1  | MT3   | PCOC1 | RARR2 | SUCO  | ZP2     |
| C1QT4 | CNTN1 | DYL2  | GLRX1 | K2C5  | MTPN  | PCP   | RCN1  | SUSD5 | ZPI     |

**Supplementary Materials Table S1. A total of 790 proteins investigated in this study.**

| Protein | Mean Difference | p-Value | Protein | Mean Difference | p-Value | Protein | Mean Difference | p-Value |
|---------|-----------------|---------|---------|-----------------|---------|---------|-----------------|---------|
| A1BG    | -2.269          | 0.023   | DSC3    | -1.989          | 0.047   | MIME    | -2.305          | 0.021   |
| A2AP    | -2.603          | 0.009   | DYL2    | -1.989          | 0.047   | MYH15   | -2.865          | 0.004   |
| ADA10   | -2.257          | 0.024   | ECM2    | -2.233          | 0.026   | MYH7    | -3.317          | 0.001   |
| ADIRF   | -2.103          | 0.035   | EFNA1   | -2.151          | 0.031   | NDRG2   | -2.370          | 0.018   |
| AEBP1   | -2.910          | 0.004   | ENOA    | -2.187          | 0.029   | NEDD8   | -2.612          | 0.009   |
| AFAM    | -2.007          | 0.045   | ENPL    | -2.160          | 0.031   | OAF     | -2.612          | 0.009   |
| ALDOA   | -2.115          | 0.034   | F13B    | -3.100          | 0.002   | OLFL3   | -2.151          | 0.031   |
| AMBP    | -3.380          | 0.001   | FA10    | -2.898          | 0.004   | OMD     | -1.979          | 0.048   |
| ANGI    | -3.281          | 0.001   | FABPH   | -3.010          | 0.003   | OSTP    | -2.007          | 0.045   |
| ANT3    | -2.287          | 0.022   | FBLN1   | -2.124          | 0.034   | PARK7   | -2.567          | 0.010   |
| APOA2   | -2.278          | 0.023   | FBLN3   | -2.260          | 0.024   | PCOC1   | -2.368          | 0.018   |
| APOA4   | -2.892          | 0.004   | FBLN7   | -2.269          | 0.023   | PGBM    | -2.341          | 0.019   |
| APOE    | -2.820          | 0.005   | FETUA   | -2.011          | 0.044   | PGK1    | -1.961          | 0.050   |
| APOH    | -2.712          | 0.007   | FETUB   | -3.263          | 0.001   | PGRP2   | -2.956          | 0.003   |
| BGH3    | -2.124          | 0.034   | FIBA    | -2.395          | 0.017   | PGS1    | -2.123          | 0.034   |
| BMP1    | -2.296          | 0.022   | GELS    | -2.404          | 0.016   | PLMN    | -2.820          | 0.005   |
| C163A   | -1.961          | 0.050   | GLDN    | -3.100          | 0.002   | PON1    | -2.540          | 0.011   |
| C1RL    | -2.504          | 0.012   | GMFB    | -2.233          | 0.026   | PPIA    | -2.187          | 0.029   |
| CAD11   | -2.233          | 0.026   | GNPTG   | -2.007          | 0.045   | PROC    | -2.317          | 0.020   |
| CAD20   | -2.185          | 0.029   | HABP2   | -2.847          | 0.004   | RARR2   | -2.368          | 0.018   |
| CADH5   | -2.793          | 0.005   | HEG1    | -2.513          | 0.012   | RET4    | -3.742          | 0.000   |
| CADM4   | -1.961          | 0.050   | HELZ    | -2.621          | 0.009   | RNAS4   | -2.404          | 0.016   |
| CALB2   | -2.892          | 0.004   | HEMO    | -2.350          | 0.019   | RNAS6   | -2.197          | 0.028   |
| CART    | -1.995          | 0.046   | HEP2    | -2.802          | 0.005   | SAMP    | -2.052          | 0.040   |
| CATF    | -2.196          | 0.028   | HRG     | -2.838          | 0.005   | SEP15   | -2.106          | 0.035   |
| CATH    | -2.847          | 0.004   | HSP7C   | -2.169          | 0.030   | SH3L1   | -2.142          | 0.032   |
| CATS    | -1.961          | 0.050   | IBP3    | -2.531          | 0.011   | SLPI    | -2.721          | 0.007   |
| CBG     | -2.115          | 0.034   | IBP4    | -2.151          | 0.031   | SMOC1   | -2.829          | 0.005   |
| CBPB2   | -2.061          | 0.039   | IBP5    | -2.133          | 0.033   | SNED1   | -1.981          | 0.048   |
| CBPN    | -2.992          | 0.003   | IBP6    | -2.214          | 0.027   | SODE    | -2.178          | 0.029   |
| CCL2    | -1.998          | 0.046   | IBP7    | -2.214          | 0.027   | SPON1   | -2.016          | 0.044   |
| CD14    | -2.431          | 0.015   | IC1     | -3.155          | 0.002   | STMN1   | -2.341          | 0.019   |
| CFAD    | -2.910          | 0.004   | IDD     | -2.255          | 0.024   | SYUG    | -2.368          | 0.018   |

|       |        |       |       |        |       |         |        |       |
|-------|--------|-------|-------|--------|-------|---------|--------|-------|
| CFAH  | -3.010 | 0.003 | IPSP  | -2.838 | 0.005 | SZT2    | -3,028 | 0.002 |
| CFAI  | -2.151 | 0.031 | ITIH2 | -2.531 | 0.011 | TAGL3   | -2,436 | 0.015 |
| CH3L1 | -2.585 | 0.010 | ITIH4 | -2.431 | 0.015 | TBD2A   | -2,874 | 0.004 |
| CL049 | -2.513 | 0.012 | KAIN  | -2.766 | 0.006 | THBG    | -2,165 | 0.030 |
| CLUS  | -2.377 | 0.017 | KLKB1 | -2.412 | 0.016 | TICN3   | -2,187 | 0.029 |
| CO2   | -2.133 | 0.033 | KNG1  | -2.766 | 0.006 | TIMP2   | -2,124 | 0.034 |
| CO3   | -2.468 | 0.014 | KPYM  | -2.269 | 0.023 | TMED4   | -2,250 | 0.024 |
| CO5   | -2.495 | 0.013 | LAMA2 | -2.269 | 0.023 | TSP4    | -2,863 | 0.004 |
| CO6A3 | -2.332 | 0.020 | LDHB  | -2.025 | 0.043 | TYB10   | -2,187 | 0.029 |
| CO7   | -2.522 | 0.012 | LEG1  | -2.341 | 0.019 | VASN    | -2,251 | 0.024 |
| CO8A  | -2.612 | 0.009 | LG3BP | -1.975 | 0.048 | VTDB    | -2,359 | 0.018 |
| CO8B  | -2.156 | 0.031 | LMAN1 | -2.085 | 0.037 | VTNC    | -2,965 | 0.003 |
| CO8G  | -2.296 | 0.022 | LTBP2 | -2.314 | 0.021 | X1433B  | -2,685 | 0.007 |
| CPVL  | -2.139 | 0.032 | LTBP4 | -1.989 | 0.047 | X1433Z  | -2,603 | 0.009 |
| CRDL1 | -2.212 | 0.027 | LUM   | -2.784 | 0.005 | X1C12P1 | -2,730 | 0.006 |
| CRLD1 | -2.097 | 0.036 | LYSC  | -2.910 | 0.004 | ZA2G    | -2,739 | 0.006 |
| CSF1  | -2.142 | 0.032 | MA2A1 | -3.204 | 0.001 |         |        |       |
| CXL16 | -2.033 | 0.042 | MEG10 | -1.970 | 0.049 |         |        |       |
| CYTB  | -2.287 | 0.022 | MIA   | -2.617 | 0.009 |         |        |       |

**Supplementary Materials Table S2. Proteins differentially expressed between NPS positive and negative groups (Mann–Whitney U test, p-value < 0.005).**

| Protein | Coeff. | Protein | Coeff. | Protein | Coeff. |
|---------|--------|---------|--------|---------|--------|
| DNS2A   | -0.3   | LRP11   | -0.21  | MANBA   | 0.21   |
| CO1A1   | -0.26  | PCP     | -0.21  | CLN5    | 0.24   |
| CNTN1   | -0.25  | PDYN    | -0.21  | TSP1    | 0.24   |
| MOG     | -0.25  | PCDH7   | -0.2   | CADM2   | 0.25   |
| EPHB2   | -0.25  | ANGI    | -0.2   | WSCD1   | 0.25   |
| NPY     | -0.23  | NEGR1   | -0.19  | KCRU    | 0.28   |
| BAI3    | -0.23  | IDS     | -0.19  | TPIS    | 0.28   |
| THRB    | -0.22  | K1C14   | -0.17  | KAIN    | 0.31   |

**Supplementary Materials Table S3. Association between total NPI-Q > 0 and analytes (only significant values showed).**

| Pathway identifier                                             | Pathway name                                           | p-value | False-discovery rate |
|----------------------------------------------------------------|--------------------------------------------------------|---------|----------------------|
| <b>Lipid Metabolism</b>                                        |                                                        |         |                      |
| R-HSA-174824                                                   | Plasma lipoprotein assembly, remodeling, and clearance | 0.013*  | 0.097*               |
| R-HSA-8963901                                                  | Chylomicron remodeling                                 | 0.024*  | 0.097*               |
| R-HSA-8963888                                                  | Chylomicron assembly                                   | 0.024*  | 0.097*               |
| R-HSA-8866427                                                  | VLDLR internalisation and degradation                  | 0.028*  | 0.097*               |
| R-HSA-8964038                                                  | LDL clearance                                          | 0.045*  | 0.097*               |
| R-HSA-8963898                                                  | Plasma lipoprotein assembly                            | 0.045*  | 0.097*               |
| R-HSA-8963889                                                  | Assembly of active LPL and LIPC lipase complexes       | 0.045*  | 0.097*               |
| R-HSA-8964043                                                  | Plasma lipoprotein clearance                           | 0.077   | 0.097*               |
| R-HSA-8963899                                                  | Plasma lipoprotein remodeling                          | 0.077   | 0.097*               |
| R-HSA-975634                                                   | Retinoid metabolism and transport                      | 0.101   | 0.101*               |
| R-HSA-1483257                                                  | Phospholipid metabolism                                | 0.404   | 0.404                |
| R-HSA-556833                                                   | Metabolism of lipids                                   | 0.846   | 0.846                |
| <b>Immune response</b>                                         |                                                        |         |                      |
| R-HSA-182218                                                   | Nef Mediated CD8 Down-regulation                       | 0.019*  | 0.097*               |
| R-HSA-1483148                                                  | Synthesis of PG                                        | 0.019*  | 0.097*               |
| R-HSA-167590                                                   | Nef Mediated CD4 Down-regulation                       | 0.024*  | 0.097*               |
| R-HSA-6798695                                                  | Neutrophil degranulation                               | 0.027*  | 0.097**              |
| R-HSA-177504                                                   | Retrograde neurotrophin signalling                     | 0.033*  | 0.097*               |
| R-HSA-2132295                                                  | MHC class II antigen presentation                      | 0.046*  | 0.097*               |
| R-HSA-168249                                                   | Innate Immune System                                   | 0.061   | 0.097*               |
| R-HSA-168256                                                   | Immune System                                          | 0.161   | 0.161*               |
| R-HSA-877300                                                   | Interferon gamma signaling                             | 0.374   | 0.374                |
| R-HSA-913531                                                   | Interferon Signaling                                   | 0.508   | 0.508                |
| R-HSA-1280218                                                  | Adaptive Immune System                                 | 0.681   | 0.681                |
| R-HSA-1280215                                                  | Cytokine Signaling in Immune system                    | 0.866   | 0.866                |
| <b>Glycosylation and other posttranslational modifications</b> |                                                        |         |                      |
| R-HSA-2206296                                                  | MPS II - Hunter syndrome                               | 0.002*  | 0.097*               |
| R-HSA-1630316                                                  | Glycosaminoglycan metabolism                           | 0.003*  | 0.097*               |
| R-HSA-3656244                                                  | Defective B4GALT1 causes B4GALT1-CDG (CDG-2d)          | 0.019*  | 0.097*               |
| R-HSA-3656243                                                  | Defective ST3GAL3 causes MCT12 and EIEE15              | 0.019*  | 0.097*               |
| R-HSA-3656225                                                  | Defective CHST6 causes MCDC1                           | 0.019*  | 0.097*               |

|                   |                                                                      |         |        |
|-------------------|----------------------------------------------------------------------|---------|--------|
| R-HSA-2206281     | Mucopolysaccharidoses                                                | 0.026*  | 0.097* |
| R-HSA-2022857     | Keratan sulfate degradation                                          | 0.0309* | 0.097* |
| R-HSA-879415      | Advanced glycosylation endproduct receptor signaling                 | 0.0309* | 0.097* |
| R-HSA-2024101     | CS/DS degradation                                                    | 0.033*  | 0.097* |
| R-HSA-2142845     | Hyaluronan metabolism                                                | 0.04*   | 0.097* |
| R-HSA-3781865     | Diseases of glycosylation                                            | 0.048*  | 0.097* |
| R-HSA-2024096     | HS-GAG degradation                                                   | 0.052   | 0.097* |
| R-HSA-2022854     | Keratan sulfate biosynthesis                                         | 0.065   | 0.097* |
| R-HSA-9694548     | Maturation of spike protein                                          | 0.07    | 0.097* |
| R-HSA-1638074     | Keratan sulfate/keratin metabolism                                   | 0.079   | 0.097* |
| R-HSA-532668      | N-glycan trimming in the ER and Calnexin/Calreticulin cycle          | 0.081   | 0.097* |
| R-HSA-5083635     | Defective B3GALTL causes Peters-plus syndrome (PpS)                  | 0.087   | 0.097* |
| R-HSA-5173214     | O-glycosylation of TSR domain-containing proteins                    | 0.09    | 0.097* |
| R-HSA-3560782     | Diseases associated with glycosaminoglycan metabolism                | 0.094   | 0.097* |
| R-HSA-1793185     | Chondroitin sulfate/dermatan sulfate metabolism                      | 0.112   | 0.112* |
| R-HSA-1638091     | Heparan sulfate/heparin (HS-GAG) metabolism                          | 0.125   | 0.125* |
| R-HSA-3906995     | Diseases associated with O-glycosylation of proteins                 | 0.158   | 0.158* |
| R-HSA-446203      | Asparagine N-linked glycosylation                                    | 0.167   | 0.167* |
| R-HSA-5173105     | O-linked glycosylation                                               | 0.242   | 0.242* |
| R-HSA-1483206     | Glycerophospholipid biosynthesis                                     | 0.269   | 0.269* |
| R-HSA-597592      | Post-translational protein modification                              | 0.255   | 0.255* |
| R-HSA-163841      | Gamma carboxylation, hypusine formation and arylsulfatase activation | 0.0967  | 0.097* |
| R-HSA-9683686     | Maturation of spike protein                                          | 0.014   | 0.097* |
| R-HSA-901042      | Calnexin/calreticulin                                                | 0.0609  | 0.097* |
| <b>Hemostasis</b> |                                                                      |         |        |
| R-HSA-9673218     | Defective F9 secretion                                               | 0.002*  | 0.097* |
| R-HSA-9673240     | Defective gamma-carboxylation of F9                                  | 0.005*  | 0.097* |
| R-HSA-9672396     | Defective cofactor function of FVIIIa variant                        | 0.007*  | 0.097* |
| R-HSA-9673202     | Defective F9 variant does not activate FX                            | 0.007*  | 0.097* |
| R-HSA-9672383     | Defective factor IX causes thrombophilia                             | 0.007*  | 0.097* |
| R-HSA-140834      | Extrinsic Pathway of Fibrin Clot Formation                           | 0.012*  | 0.097* |
| R-HSA-9673221     | Defective F9 activation                                              | 0.014*  | 0.097* |



|                                              |                                                                                                |        |        |
|----------------------------------------------|------------------------------------------------------------------------------------------------|--------|--------|
| R-HSA-9662001                                | Defective factor VIII causes hemophilia A                                                      | 0.017* | 0.097* |
| R-HSA-9668250                                | Defective factor IX causes hemophilia B                                                        | 0.021* | 0.097* |
| R-HSA-9671793                                | Diseases of hemostasis                                                                         | 0.037* | 0.097* |
| R-HSA-140837                                 | Intrinsic Pathway of Fibrin Clot Formation                                                     | 0.054  | 0.097* |
| R-HSA-140877                                 | Formation of Fibrin Clot (Clotting Cascade)                                                    | 0.09   | 0.097* |
| R-HSA-109582                                 | Hemostasis                                                                                     | 0.095  | 0.097* |
| R-HSA-186797                                 | Signaling by PDGF                                                                              | 0.135  | 0.097* |
| R-HSA-114608                                 | Platelet degranulation                                                                         | 0.267  | 0.267  |
| R-HSA-76005                                  | Response to elevated platelet cytosolic Ca <sup>2+</sup>                                       | 0.276  | 0.276  |
| R-HSA-977606                                 | Regulation of Complement cascade                                                               | 0.279  | 0.279  |
| R-HSA-166658                                 | Complement cascade                                                                             | 0.2989 | 0.299  |
| R-HSA-76002                                  | Platelet activation, signaling and aggregation                                                 | 0.477  | 0.477  |
| <b>Cell adhesion and signal transduction</b> |                                                                                                |        |        |
| R-HSA-5578775                                | Ion homeostasis                                                                                | 0.007* | 0.097* |
| R-HSA-936837                                 | Ion transport by P-type ATPases                                                                | 0.007* | 0.097* |
| R-HSA-8866376                                | Reelin signalling pathway                                                                      | 0.01*  | 0.097* |
| R-HSA-216083                                 | Integrin cell surface interactions                                                             | 0.018* | 0.097* |
| R-HSA-5140745                                | WNT5A-dependent internalization of FZD2, FZD5 and ROR2                                         | 0.003* | 0.097* |
| R-HSA-373760                                 | L1CAM interactions                                                                             | 0.034* | 0.097* |
| R-HSA-5576891                                | Cardiac conduction                                                                             | 0.038* | 0.097* |
| R-HSA-9651496                                | Defects of contact activation system (CAS) and kallikrein/kinin system (KKS)                   | 0.038* | 0.097* |
| R-HSA-9703465                                | Signaling by FLT3 fusion proteins                                                              | 0.047* | 0.097* |
| R-HSA-164938                                 | Nef-mediates down modulation of cell surface receptors by recruiting them to clathrin adapters | 0.052  | 0.097* |
| R-HSA-373753                                 | Nephrin family interactions                                                                    | 0.054  | 0.097* |
| R-HSA-210991                                 | Basigin interactions                                                                           | 0.059  | 0.097* |
| R-HSA-3000170                                | Syndecan interactions                                                                          | 0.063  | 0.097* |
| R-HSA-9682385                                | FLT3 signaling in disease                                                                      | 0.07   | 0.097* |
| R-HSA-445095                                 | Interaction between L1 and Ankyrins                                                            | 0.072  | 0.097* |
| R-HSA-399721                                 | Glutamate binding, activation of AMPA receptors and synaptic plasticity                        | 0.072  | 0.097* |
| R-HSA-983712                                 | Ion channel transport                                                                          | 0.073  | 0.097* |
| R-HSA-202733                                 | Cell surface interactions at the vascular wall                                                 | 0.118  | 0.118* |
| R-HSA-9662361                                | Sensory processing of sound by outer hair cells of the cochlea                                 | 0.127  | 0.127* |

|                                          |                                                                                                                             |        |        |
|------------------------------------------|-----------------------------------------------------------------------------------------------------------------------------|--------|--------|
| R-HSA-3000171                            | Non-integrin membrane-ECM interactions                                                                                      | 0.133  | 0.133* |
| R-HSA-375165                             | NCAM signaling for neurite out-growth                                                                                       | 0.144  | 0.144* |
| R-HSA-422475                             | Axon guidance                                                                                                               | 0.15   | 0.15*  |
| R-HSA-9662360                            | Sensory processing of sound by inner hair cells of the cochlea                                                              | 0.156  | 0.156* |
| R-HSA-9675108                            | Nervous system development                                                                                                  | 0.165  | 0.165* |
| R-HSA-9659379                            | Sensory processing of sound                                                                                                 | 0.172  | 0.172* |
| R-HSA-2682334                            | EPH-Ephrin signaling                                                                                                        | 0.2    | 0.2*   |
| R-HSA-2187338                            | Visual phototransduction                                                                                                    | 0.215  | 0.215* |
| R-HSA-187037                             | Signaling by NTRK1 (TRKA)                                                                                                   | 0.247  | 0.247* |
| R-HSA-1500931                            | Cell-Cell communication                                                                                                     | 0.271  | 0.271  |
| R-HSA-166520                             | Signaling by NTRKs                                                                                                          | 0.287  | 0.287  |
| R-HSA-3858494                            | Beta-catenin independent WNT signaling                                                                                      | 0.295  | 0.295  |
| R-HSA-9711123                            | Cellular response to chemical stress                                                                                        | 0.324  | 0.324  |
| R-HSA-9006934                            | Signaling by Receptor Tyrosine Kinases                                                                                      | 0.362  | 0.362  |
| R-HSA-112314                             | Neurotransmitter receptors and postsynaptic signal transmission                                                             | 0.398  | 0.398  |
| R-HSA-9709957                            | Sensory Perception                                                                                                          | 0.436  | 0.436  |
| R-HSA-112315                             | Transmission across Chemical Synapses                                                                                       | 0.487  | 0.487  |
| R-HSA-195721                             | Signaling by WNT                                                                                                            | 0.519  | 0.519  |
| R-HSA-5684996                            | MAPK1/MAPK3 signaling                                                                                                       | 0.519  | 0.519  |
| R-HSA-5683057                            | MAPK family signaling cascades                                                                                              | 0.563  | 0.563  |
| R-HSA-5663202                            | Diseases of signal transduction by growth factor receptors and second messengers                                            | 0.641  | 0.641  |
| R-HSA-2262752                            | Cellular responses to stress                                                                                                | 0.805  | 0.805  |
| R-HSA-8953897                            | Cellular responses to external stimuli                                                                                      | 0.812  | 0.812  |
| R-HSA-194315                             | Signaling by Rho GTPases                                                                                                    | 0.813  | 0.813  |
| R-HSA-9716542                            | Signaling by Rho GTPases, Miro GTPases and RHOBTB3                                                                          | 0.82   | 0.82   |
| R-HSA-162582                             | Signal Transduction                                                                                                         | 0.964  | 0.964  |
| <b>Intra-cellular and cell transport</b> |                                                                                                                             |        |        |
| R-HSA-159763                             | Transport of gamma-carboxylated protein precursors from the endoplasmic reticulum to the Golgi apparatus                    | 0.021* | 0.097* |
| R-HSA-159854                             | Gamma-carboxylation, Transport, and amino-terminal cleavage of proteins                                                     | 0.026* | 0.097* |
| R-HSA-381426                             | Regulation of Insulin-like Growth Factor (IGF) transport and uptake by Insulin-like Growth Factor Binding Proteins (IGFBPs) | 0.036* | 0.097* |
| R-HSA-416993                             | Trafficking of GluR2-containing AMPA receptors                                                                              | 0.04*  | 0.097* |

|               |                                                                       |        |         |
|---------------|-----------------------------------------------------------------------|--------|---------|
| R-HSA-399719  | Trafficking of AMPA receptors                                         | 0.072  | 0.097*  |
| R-HSA-382551  | Transport of small molecules                                          | 0.097  | 0.097*  |
| R-HSA-1268020 | Mitochondrial protein import                                          | 0.146  | 0.146*  |
| R-HSA-6807878 | COPI-mediated anterograde transport                                   | 0.219  | 0.219*  |
| R-HSA-8856825 | Cargo recognition for clathrin-mediated endocytosis                   | 0.225  | 0.225*  |
| R-HSA-8856828 | Clathrin-mediated endocytosis                                         | 0.297  | 0.297   |
| R-HSA-199977  | ER to Golgi Anterograde Transport                                     | 0.314  | 0.314   |
| R-HSA-948021  | Transport to the Golgi and subsequent modification                    | 0.364  | 0.364   |
| R-HSA-199991  | Membrane Trafficking                                                  | 0.458  | 0.458   |
| R-HSA-5653656 | Vesicle-mediated transport                                            | 0.557  | 0.557   |
| <b>Other</b>  |                                                                       |        |         |
| R-HSA-71387   | Metabolism of carbohydrates                                           | 0.005* | 0.097*  |
| R-HSA-8853383 | Lysosomal oligosaccharide catabolism                                  | 0.009* | 0.009*  |
| R-HSA-5668914 | Diseases of metabolism                                                | 0.021* | 0.097*  |
| R-HSA-71288   | Creatine metabolism                                                   | 0.024* | 0.097*  |
| R-HSA-159782  | Removal of aminoterminal propeptides from gamma-carboxylated proteins | 0.024* | 0.097*  |
| R-HSA-159740  | Gamma-carboxylation of protein precursors                             | 0.024* | 0.097*  |
| R-HSA-8957275 | Post-translational protein phosphorylation                            | 0.024* | 0.097*  |
| R-HSA-2160916 | Hyaluronan uptake and degradation                                     | 0.028* | 0.097*  |
| R-HSA-5099900 | WNT5A-dependent internalization of FZD4                               | 0.036* | 0.097*  |
| R-HSA-1643685 | Disease                                                               | 0.036* | 0.097*  |
| R-HSA-163210  | Formation of ATP by chemiosmotic coupling                             | 0.042* | 0.097*  |
| R-HSA-8949613 | Cristae formation                                                     | 0.072  | 0.097*  |
| R-HSA-9013424 | RHOV GTPase cycle                                                     | 0.077  | 0.097*  |
| R-HSA-9683701 | Translation of structural proteins                                    | 0.077  | 0.097*  |
| R-HSA-9013420 | RHOU GTPase cycle                                                     | 0.079  | 0.097*  |
| R-HSA-5663084 | Diseases of carbohydrate metabolism                                   | 0.079  | 0.097*  |
| R-HSA-397014  | Muscle contraction                                                    | 0.081  | 0.097** |
| R-HSA-3299685 | Detoxification of Reactive Oxygen Species                             | 0.09   | 0.097*  |
| R-HSA-6806667 | Metabolism of fat-soluble vitamins                                    | 0.11   | 0.11*   |
| R-HSA-437239  | Recycling pathway of L1                                               | 0.112  | 0.112*  |
| R-HSA-9694635 | Translation of structural proteins                                    | 0.112  | 0.112*  |
| R-HSA-3928665 | EPH-ephrin mediated repulsion of cells                                | 0.116  | 0.116*  |
| R-HSA-1430728 | Metabolism                                                            | 0.132  | 0.132*  |

|                 |                                                                                                                     |       |        |
|-----------------|---------------------------------------------------------------------------------------------------------------------|-------|--------|
| R-HSA-8936459   | RUNX1 regulates genes involved in megakaryocyte differentiation and platelet function                               | 0.148 | 0.148* |
| R-HSA-1474244   | Extracellular matrix organization                                                                                   | 0.164 | 0.164* |
| R-HSA-977225    | Amyloid fiber formation                                                                                             | 0.178 | 0.178* |
| R-HSA-4086400   | PCP/CE pathway                                                                                                      | 0.2   | 0.2*   |
| R-HSA-1592230   | Mitochondrial biogenesis                                                                                            | 0.2   | 0.2*   |
| R-HSA-163200    | Respiratory electron transport, ATP synthesis by chemiosmotic coupling, and heat production by uncoupling proteins. | 0.265 | 0.265  |
| R-HSA-6809371   | Formation of the cornified envelope                                                                                 | 0.269 | 0.269  |
| R-HSA-1266738   | Developmental Biology                                                                                               | 0.278 | 0.278  |
| R-HSA-1474228   | Degradation of the extracellular matrix                                                                             | 0.288 | 0.288  |
| R-HSA-9609507   | Protein localization                                                                                                | 0.332 | 0.332  |
| R-HSA-1428517   | The citric acid (TCA) cycle and respiratory electron transport                                                      | 0.352 | 0.352  |
| R-HSA-392499    | Metabolism of proteins                                                                                              | 0.358 | 0.358  |
| R-HSA-196854    | Metabolism of vitamins and cofactors                                                                                | 0.374 | 0.374  |
| R-HSA-8878171   | Transcriptional regulation by RUNX1                                                                                 | 0.398 | 0.398  |
| R-HSA-6805567   | Keratinization                                                                                                      | 0.411 | 0.411  |
| R-HSA-5673001   | RAF/MAP kinase cascade                                                                                              | 0.511 | 0.511  |
| R-HSA-1852241   | Organelle biogenesis and maintenance                                                                                | 0.518 | 0.518  |
| R-HSA-71291     | Metabolism of amino acids and derivatives                                                                           | 0.603 | 0.603  |
| R-HSA-112316    | Neuronal System                                                                                                     | 0.643 | 0.643  |
| R-HSA-9012999   | RHO GTPase cycle                                                                                                    | 0.667 | 0.667  |
| R-HSA-212436    | Generic Transcription Pathway                                                                                       | 0.96  | 0.96   |
| R-HSA-73857     | RNA Polymerase II Transcription                                                                                     | 0.971 | 0.971  |
| R-HSA-74160     | Gene expression (Transcription)                                                                                     | 0.981 | 0.981  |
| <b>Excluded</b> |                                                                                                                     |       |        |
| R-HSA-9679506   | SARS-CoV Infections                                                                                                 | 0     | 0.095  |
| R-HSA-9679191   | Potential therapeutics for SARS                                                                                     | 0.007 | 0.001  |
| R-HSA-164952    | The role of Nef in HIV-1 replication and disease pathogenesis                                                       | 0.068 | 0.097  |
| R-HSA-9678108   | SARS-CoV-1 Infection                                                                                                | 0.135 | 0.135  |
| R-HSA-9694516   | SARS-CoV-2 Infection                                                                                                | 0.17  | 0.17   |
| R-HSA-162909    | Host Interactions of HIV factors                                                                                    | 0.295 | 0.295  |
| R-HSA-5663205   | Infectious disease                                                                                                  | 0.32  | 0.32   |
| R-HSA-162906    | HIV Infection                                                                                                       | 0.454 | 0.454  |

**Supplementary Materials Table S4. Ontological categories for total NPI-Q.**

**\* only pathways with FDR<0.25 and p-value<were included for further analysis.**

| Pathway identifier                                             | Pathway name                                                                                | p-value | False-discovery rate |
|----------------------------------------------------------------|---------------------------------------------------------------------------------------------|---------|----------------------|
| <b>Immune response</b>                                         |                                                                                             |         |                      |
| R-HSA-6788467                                                  | IL-6-type cytokine receptor ligand interactions                                             | 0.012*  | 0.075*               |
| R-HSA-6783589                                                  | Interleukin-6 family signaling                                                              | 0.019*  | 0.077*               |
| R-HSA-168256                                                   | Immune System                                                                               | 0.051   | 0.096*               |
| R-HSA-977606                                                   | Regulation of Complement cascade                                                            | 0.089   | 0.096*               |
| R-HSA-166658                                                   | Complement cascade                                                                          | 0.096   | 0.096*               |
| R-HSA-198933                                                   | Immunoregulatory interactions between a Lymphoid and a non-Lymphoid cell                    | 0.187   | 0.187*               |
| R-HSA-168249                                                   | Innate Immune System                                                                        | 0.195   | 0.195*               |
| R-HSA-449147                                                   | Signaling by Interleukins                                                                   | 0.275   | 0.275                |
| R-HSA-6798695                                                  | Neutrophil degranulation                                                                    | 0.287   | 0.287                |
| R-HSA-1280215                                                  | Cytokine Signaling in Immune system                                                         | 0.437   | 0.437                |
| R-HSA-1280218                                                  | Adaptive Immune System                                                                      | 0.496   | 0.496                |
| <b>Glycosylation and other posttranslational modifications</b> |                                                                                             |         |                      |
| R-HSA-913709                                                   | O-linked glycosylation of mucins                                                            | 0.044*  | 0.096*               |
| R-HSA-5173105                                                  | O-linked glycosylation                                                                      | 0.076   | 0.096*               |
| R-HSA-597592                                                   | Post-translational protein modification                                                     | 0.65    | 0.65*                |
| <b>Neurodegeneration</b>                                       |                                                                                             |         |                      |
| R-HSA-8863678                                                  | Neurodegenerative Diseases                                                                  | 0.015*  | 0.075*               |
| R-HSA-8862803                                                  | Deregulated CDK5 triggers multiple neurodegenerative pathways in Alzheimer's disease models | 0.015*  | 0.075*               |
| <b>Response to stress</b>                                      |                                                                                             |         |                      |
| R-HSA-3299685                                                  | Detoxification of Reactive Oxygen Species                                                   | 0*      | 0.009*               |
| R-HSA-9711123                                                  | Cellular response to chemical stress                                                        | 0.324   | 0.324                |
| R-HSA-2262752                                                  | Cellular responses to stress                                                                | 0.07    | 0.096*               |
| R-HSA-8953897                                                  | Cellular responses to external stimuli                                                      | 0.074   | 0.096*               |
| <b>Other</b>                                                   |                                                                                             |         |                      |
| R-HSA-9645723                                                  | Diseases of programmed cell death                                                           | 0.048*  | 0.096*               |
| R-HSA-5628897                                                  | TP53 Regulates Metabolic Genes                                                              | 0.059   | 0.096*               |
| R-HSA-3700989                                                  | Transcriptional Regulation by TP53                                                          | 0.227   | 0.096*               |
| R-HSA-212436                                                   | Generic Transcription Pathway                                                               | 0.601   | 0.601                |
| R-HSA-73857                                                    | RNA Polymerase II Transcription                                                             | 0.637   | 0.637                |
| R-HSA-74160                                                    | Gene expression (Transcription)                                                             | 0.676   | 0.676                |
| R-HSA-1643685                                                  | Disease                                                                                     | 0.773   | 0.773                |
| R-HSA-392499                                                   | Metabolism of proteins                                                                      | 0.783   | 0.783                |

**Supplementary Materials Table S5. Ontological categories for depression.**

**\*only pathways with FDR<0.25 and p-value< 0.05 were included for further analysis**

| Pathway identifier                                             | Pathway name                                                | p-value | False-discovery rate |
|----------------------------------------------------------------|-------------------------------------------------------------|---------|----------------------|
| <b>Lipid metabolism</b>                                        |                                                             |         |                      |
| R-HSA-8963901                                                  | Chylomicron remodeling                                      | 0.007*  | 0.055*               |
| R-HSA-8963888                                                  | Chylomicron assembly                                        | 0.007*  | 0.055*               |
| R-HSA-8963898                                                  | Plasma lipoprotein assembly                                 | 0.013*  | 0.055*               |
| R-HSA-8963889                                                  | Assembly of active LPL and LIPC lipase complexes            | 0.013*  | 0.055*               |
| R-HSA-8963899                                                  | Plasma lipoprotein remodeling                               | 0.022*  | 0.055*               |
| R-HSA-174824                                                   | Plasma lipoprotein assembly, Remodeling, and clearance      | 0.049*  | 0.055*               |
| <b>Immune response</b>                                         |                                                             |         |                      |
| R-HSA-168249                                                   | Innate Immune System                                        | 0.195   | 0.195*               |
| R-HSA-6798695                                                  | Neutrophil degranulation                                    | 0.287   | 0.287                |
| R-HSA-168256                                                   | Immune System                                               | 0.479   | 0.479                |
| <b>Glycosylation and other posttranslational modifications</b> |                                                             |         |                      |
| R-HSA-9683686                                                  | Maturation of spike protein                                 | 0.004*  | 0.055*               |
| R-HSA-879415                                                   | Advanced glycosylation endproduct receptor signaling        | 0.009*  | 0.055*               |
| R-HSA-901042                                                   | Calnexin/calreticulin cycle                                 | 0.018*  | 0.055*               |
| R-HSA-9694548                                                  | Maturation of spike protein                                 | 0.02*   | 0.055*               |
| R-HSA-532668                                                   | N-glycan trimming in the ER and Calnexin/Calreticulin cycle | 0.024*  | 0.055*               |
| R-HSA-8957275                                                  | Post-translational protein phosphorylation                  | 0.071   | 0.071*               |
| R-HSA-446203                                                   | Asparagine N-linked glycosylation                           | 0.192   | 0.192*               |
| R-HSA-597592                                                   | Post-translational protein modification                     | 0.649   | 0.649                |
| <b>Cell adhesion and signal transduction</b>                   |                                                             |         |                      |
| R-HSA-418990                                                   | Adherens junctions interactions                             | 0.022*  | 0.055*               |
| R-HSA-421270                                                   | Cell-cell junction organization                             | 0.044*  | 0.055*               |
| R-HSA-446728                                                   | Cell junction organization                                  | 0.062   | 0.062*               |
| R-HSA-8856825                                                  | Cargo recognition for clathrin-mediated endocytosis         | 0.07    | 0.07*                |
| R-HSA-5576891                                                  | Cardiac conduction                                          | 0.084   | 0.084*               |
| R-HSA-1500931                                                  | Cell-Cell communication                                     | 0.084   | 0.084*               |
| R-HSA-983712                                                   | Ion channel transport                                       | 0.12    | 0.12*                |
| <b>Intra-cellular and cell transport</b>                       |                                                             |         |                      |

|                          |                                                                                                                             |        |        |
|--------------------------|-----------------------------------------------------------------------------------------------------------------------------|--------|--------|
| R-HSA-936837             | Ion transport by P-type ATPases                                                                                             | 0.037* | 0.055* |
| R-HSA-382551             | Transport of small molecules                                                                                                | 0.086* | 0.086* |
| R-HSA-8856828            | Clathrin-mediated endocytosis                                                                                               | 0.096* | 0.096* |
| R-HSA-199991             | Membrane Trafficking                                                                                                        | 0.363  | 0.363  |
| R-HSA-5653656            | Vesicle-mediated transport                                                                                                  | 0.419  | 0.419  |
| <b>Neurodegeneration</b> |                                                                                                                             |        |        |
| R-HSA-977225             | Amyloid fiber formation                                                                                                     | 0.055  | 0.055* |
| <b>Other</b>             |                                                                                                                             |        |        |
| R-HSA-9683701            | Translation of structural proteins                                                                                          | 0.022* | 0.055* |
| R-HSA-975634             | Retinoid metabolism and transport                                                                                           | 0.03*  | 0.055* |
| R-HSA-6806667            | Metabolism of fat-soluble vitamins                                                                                          | 0.033* | 0.055* |
| R-HSA-9694635            | Translation of structural proteins                                                                                          | 0.033* | 0.055* |
| R-HSA-5578775            | Ion homeostasis                                                                                                             | 0.037* | 0.055* |
| R-HSA-2187338            | Visual phototransduction                                                                                                    | 0.067  | 0.067* |
| R-HSA-381426             | Regulation of Insulin-like Growth Factor (IGF) transport and uptake by Insulin-like Growth Factor Binding Proteins (IGFBPs) | 0.082  | 0.082* |
| R-HSA-196854             | Metabolism of vitamins and cofactors                                                                                        | 0.125  | 0.125* |
| R-HSA-397014             | Muscle contraction                                                                                                          | 0.127  | 0.127* |
| R-HSA-9709957            | Sensory Perception                                                                                                          | 0.35   | 0.35   |
| R-HSA-1643685            | Disease                                                                                                                     | 0.403  | 0.403  |
| R-HSA-392499             | Metabolism of proteins                                                                                                      | 0.417  | 0.417  |
| R-HSA-1430728            | Metabolism                                                                                                                  | 0.806  | 0.806  |
| <b>Excluded</b>          |                                                                                                                             |        |        |
| R-HSA-9679506            | SARS-CoV Infections                                                                                                         | 0.005  | 0.055  |
| R-HSA-9678108            | SARS-CoV-1 Infection                                                                                                        | 0.041  | 0.055  |
| R-HSA-9694516            | SARS-CoV-2 Infection                                                                                                        | 0.051  | 0.055  |
| R-HSA-9679191            | Potential therapeutics for SARS                                                                                             | 0.055  | 0.055  |
| R-HSA-5663205            | Infectious disease                                                                                                          | 0.193  | 0.193  |



| Pathway identifier                                             | Pathway name                                                | p-value | adjusted p-value |
|----------------------------------------------------------------|-------------------------------------------------------------|---------|------------------|
| <b>Lipid metabolism</b>                                        |                                                             |         |                  |
| R-HSA-8963901                                                  | Chylomicron remodeling                                      | 0.007   | 0.055            |
| R-HSA-8963888                                                  | Chylomicron assembly                                        | 0.007   | 0.055            |
| R-HSA-8963898                                                  | Plasma lipoprotein assembly                                 | 0.013   | 0.055            |
| R-HSA-8963889                                                  | Assembly of active LPL and LIPC lipase complexes            | 0.013   | 0.055            |
| R-HSA-8963899                                                  | Plasma lipoprotein remodeling                               | 0.022   | 0.055            |
| R-HSA-174824                                                   | Plasma lipoprotein assembly, Remodeling, and clearance      | 0.049   | 0.055            |
| <b>Immune response</b>                                         |                                                             |         |                  |
| R-HSA-168249                                                   | Innate Immune System                                        | 0.195   | 0.195            |
| R-HSA-6798695                                                  | Neutrophil degranulation                                    | 0.287   | 0.287            |
| R-HSA-168256                                                   | Immune System                                               | 0.479   | 0.479            |
| <b>Glycosylation and other posttranslational modifications</b> |                                                             |         |                  |
| R-HSA-9683686                                                  | Maturation of spike protein                                 | 0.004   | 0.055            |
| R-HSA-879415                                                   | Advanced glycosylation endproduct receptor signaling        | 0.009   | 0.055            |
| R-HSA-901042                                                   | Calnexin/calreticulin cycle                                 | 0.018   | 0.055            |
| R-HSA-9694548                                                  | Maturation of spike protein                                 | 0.02    | 0.055            |
| R-HSA-532668                                                   | N-glycan trimming in the ER and Calnexin/Calreticulin cycle | 0.024   | 0.055            |
| R-HSA-8957275                                                  | Post-translational protein phosphorylation                  | 0.071   | 0.071            |
| R-HSA-446203                                                   | Asparagine N-linked glycosylation                           | 0.192   | 0.192            |
| R-HSA-597592                                                   | Post-translational protein modification                     | 0.649   | 0.649            |
| <b>Cell adhesion and signal transduction</b>                   |                                                             |         |                  |
| R-HSA-418990                                                   | Adherens junctions interactions                             | 0.022   | 0.055            |
| R-HSA-421270                                                   | Cell-cell junction organization                             | 0.044   | 0.055            |
| R-HSA-446728                                                   | Cell junction organization                                  | 0.062   | 0.062            |
| R-HSA-8856825                                                  | Cargo recognition for clathrin-mediated endocytosis         | 0.07    | 0.07             |
| R-HSA-5576891                                                  | Cardiac conduction                                          | 0.084   | 0.084            |
| R-HSA-1500931                                                  | Cell-Cell communication                                     | 0.084   | 0.084            |
| R-HSA-983712                                                   | Ion channel transport                                       | 0.12    | 0.12             |
| <b>Intra-cellular and cell transport</b>                       |                                                             |         |                  |

|                          |                                                                                                                             |       |       |
|--------------------------|-----------------------------------------------------------------------------------------------------------------------------|-------|-------|
| R-HSA-936837             | Ion transport by P-type ATPases                                                                                             | 0.037 | 0.055 |
| R-HSA-382551             | Transport of small molecules                                                                                                | 0.086 | 0.086 |
| R-HSA-8856828            | Clathrin-mediated endocytosis                                                                                               | 0.096 | 0.096 |
| R-HSA-199991             | Membrane Trafficking                                                                                                        | 0.363 | 0.363 |
| R-HSA-5653656            | Vesicle-mediated transport                                                                                                  | 0.419 | 0.419 |
| <b>Neurodegeneration</b> |                                                                                                                             |       |       |
| R-HSA-977225             | Amyloid fiber formation                                                                                                     | 0.055 | 0.055 |
| <b>Other</b>             |                                                                                                                             |       |       |
| R-HSA-9683701            | Translation of structural proteins                                                                                          | 0.022 | 0.055 |
| R-HSA-975634             | Retinoid metabolism and transport                                                                                           | 0.03  | 0.055 |
| R-HSA-6806667            | Metabolism of fat-soluble vitamins                                                                                          | 0.033 | 0.055 |
| R-HSA-9694635            | Translation of structural proteins                                                                                          | 0.033 | 0.055 |
| R-HSA-5578775            | Ion homeostasis                                                                                                             | 0.037 | 0.055 |
| R-HSA-2187338            | Visual phototransduction                                                                                                    | 0.067 | 0.067 |
| R-HSA-381426             | Regulation of Insulin-like Growth Factor (IGF) transport and uptake by Insulin-like Growth Factor Binding Proteins (IGFBPs) | 0.082 | 0.082 |
| R-HSA-196854             | Metabolism of vitamins and cofactors                                                                                        | 0.125 | 0.125 |
| R-HSA-397014             | Muscle contraction                                                                                                          | 0.127 | 0.127 |
| R-HSA-9709957            | Sensory Perception                                                                                                          | 0.35  | 0.35  |
| R-HSA-1643685            | Disease                                                                                                                     | 0.403 | 0.403 |
| R-HSA-392499             | Metabolism of proteins                                                                                                      | 0.417 | 0.417 |
| R-HSA-1430728            | Metabolism                                                                                                                  | 0.806 | 0.806 |
| <b>Excluded</b>          |                                                                                                                             |       |       |
| R-HSA-9679506            | SARS-CoV Infections                                                                                                         | 0.005 | 0.055 |
| R-HSA-9678108            | SARS-CoV-1 Infection                                                                                                        | 0.041 | 0.055 |
| R-HSA-9694516            | SARS-CoV-2 Infection                                                                                                        | 0.051 | 0.055 |
| R-HSA-9679191            | Potential therapeutics for SARS                                                                                             | 0.055 | 0.055 |
| R-HSA-5663205            | Infectious disease                                                                                                          | 0.193 | 0.193 |

**Supplementary Materials Table S6. Ontological categories for apathy.**

**\* only pathways with FDR<0.25 and p-value<0.05 were included for further analysis.**

| Participants without AD (n=41/15) |       |       |          | Participants with AD (n=7/21) |       |
|-----------------------------------|-------|-------|----------|-------------------------------|-------|
| A2AP                              | CO2   | IBP6  | PCOC1    | ADIRF                         | PROC  |
| ADA10                             | CO3   | IBP7  | PGRP2    | B3GN2                         | PTHD2 |
| AEBP1                             | CO5   | IC1   | PLMN     | CD109                         | SODE  |
| AFAM                              | CO8A  | IPSP  | PON1     | CPVL                          | SUCO  |
| AMBP                              | CRHBP | ITIH2 | PPN      | CRP                           |       |
| ANGI                              | F13B  | ITIH4 | RARR2    | K1C10                         |       |
| APOA2                             | FA10  | KAIN  | RET4     | K2C1                          |       |
| APOA4                             | FBLN3 | KNG1  | RNAS4    | KLKB1                         |       |
| APOH                              | FETUA | LAMA2 | SEP15    | MSLN                          |       |
| BMP1                              | FETUB | LG3BP | SEPP1    | PRKDC                         |       |
| C1RL                              | FIBA  | LMAN1 | SLPI     |                               |       |
| CADH5                             | FMOD  | LUM   | SNED1    |                               |       |
| CATH                              | GLDN  | LYSC  | TBD2A    |                               |       |
| CBG                               | HABP2 | MA1C1 | THBG     |                               |       |
| CBPN                              | HEG1  | MA2A1 | THRB     |                               |       |
| CFAD                              | HELZ  | MIA   | VASN     |                               |       |
| CFAH                              | HEMO  | MYH15 | VTDB     |                               |       |
| CFAI                              | HEP2  | MYH7  | VTNC     |                               |       |
| CL049                             | HRG   | NID2  | X1C12_P1 |                               |       |
| CLUS                              | IBP3  | OAF   | ZA2G     |                               |       |

**Supplementary Materials Table S7:** Proteins differentially expressed in participants with or without NPS in participants without AD (left) or presenting cerebral AD (right). Numbers represent participants without NPS/participants with NPS (NPI-Q > 0).

|        | NPI-Q total score | NPI-Q depression | NPI-Q apathy | NPI-Q anxiety |
|--------|-------------------|------------------|--------------|---------------|
| mean   | 5.74              | 0.56             | 0.64         | 1.05          |
| median | 4                 | 0                | 0            | 1             |
| range  | 1-26              | 0-3              | 0-3          | 0-3           |

**Supplementary Materials Table S8: Mean, median and range for the NPI-Q total score and for depression, apathy and anxiety domains.**
